# Supplementary material for: The time of Calcium Feeding Affects the Productive Performance of Sows
Source: Animals (Basel). 2019 Jun 10;9(6):337. doi: 10.3390/ani9060337 (PMC6617234; doi:10.3390/ani9060337)
Supplement: Supplementary file 1 [file animals-09-00337-s001.pdf]

## Supplementary material

Sows ( $n = 9$ ) that we selected to collect samples in each group are considered as the A group, and all sows ( $n = 25$ ) in each group are considered as the B group. We compared the performance and reproductive performance of sows between A and B groups. All data was expressed as mean  $\pm$  the standard error of the mean (SEM). Significant differences among treatment means were determined using the Homogeneity of variance test (SPSS, 17.0). The variance of each group is equal when  $p > 0.05$ ; the variance of each group is not equal when  $p < 0.05$ . The results are as follows:

**Table S1.** The performance of sows in the C group

|                                         | groups            |                   | <i>p</i> -value |
|-----------------------------------------|-------------------|-------------------|-----------------|
|                                         | A group           | B group           |                 |
| Parity                                  | 4.25 $\pm$ 0.526  | 4.05 $\pm$ 0.350  | 0.761           |
| Daily feed intake of per sow, kg        |                   |                   |                 |
| 85th–114 <sup>th</sup> day of pregnancy | 2.043 $\pm$ 0.095 | 2.09 $\pm$ 0.148  | 0.691           |
| 1st–14 <sup>th</sup> day of lactation   | 4.68 $\pm$ 0.225  | 4.64 $\pm$ 0.349  | 0.809           |
| Sow BF, mm                              |                   |                   |                 |
| On 85th day of pregnancy                | 15.87 $\pm$ 0.350 | 15.89 $\pm$ 0.491 | 0.162           |
| On 1st day of lactation                 | 15.88 $\pm$ 0.479 | 16.58 $\pm$ 0.745 | 0.312           |
| On 14 <sup>th</sup> day of lactation    | 14.00 $\pm$ 1.085 | 14.58 $\pm$ 0.652 | 0.649           |
| BF loss, mm                             |                   |                   |                 |
| 1st–14 <sup>th</sup> day of lactation   | –1.88 $\pm$ 0.789 | –2.00 $\pm$ 0.562 | 0.882           |

A group: Sows ( $n = 9$ ) that we selected to collect samples in C group; B group: All sows ( $n = 25$ ) in C group. The variance of each group is equal when  $p > 0.05$ ; the variance of each group is not equal when  $p < 0.05$ .

**Table S2.** The performance of sows in E-L group

|                                         | group             |                   | <i>p</i> -value |
|-----------------------------------------|-------------------|-------------------|-----------------|
|                                         | A group           | B group           |                 |
| Parity                                  | 4.13 $\pm$ 0.441  | 4.00 $\pm$ 0.297  | 0.564           |
| Daily feed intake of per sow, kg        |                   |                   |                 |
| 85th–114 <sup>th</sup> day of pregnancy | 2.25 $\pm$ 0.095  | 2.26 $\pm$ 0.054  | 0.543           |
| 1st–14 <sup>th</sup> day of lactation   | 4.73 $\pm$ 0.205  | 4.89 $\pm$ 0.432  | 0.829           |
| Sow BF, mm                              |                   |                   |                 |
| On 85 <sup>th</sup> day of pregnancy    | 15.49 $\pm$ 0.718 | 15.58 $\pm$ 0.491 | 0.559           |
| On 1st day of lactation                 | 16.10 $\pm$ 0.546 | 15.84 $\pm$ 0.584 | 0.412           |
| On 14th day of lactation                | 14.4 $\pm$ 0.562  | 14.26 $\pm$ 0.728 | 0.215           |
| BF loss, mm                             |                   |                   |                 |
| 1st–14 <sup>th</sup> day of lactation   | –1.78 $\pm$ 0.472 | –1.58 $\pm$ 0.636 | 0.200           |

A group: Sows ( $n = 9$ ) that we selected to collect samples in E-L group; B group: All sows ( $n = 25$ ) in E-L group. The variance of each group is equal when  $p > 0.05$ ; the variance of each group is not equal when  $p < 0.05$ .

**Table S3. The performance of sows in L-E group**

|                                         | group         |               | <i>p</i> -value |
|-----------------------------------------|---------------|---------------|-----------------|
|                                         | A group       | B group       |                 |
| Parity                                  | 4.5 ± 0.500   | 4.38 ± 0.344  | 0.839           |
| Daily feed intake of per sow, kg        |               |               |                 |
| 85th–114 <sup>th</sup> day of pregnancy | 2.25 ± 0.080  | 2.24 ± 0.075  | 0.597           |
| 1st–14 <sup>th</sup> day of lactation   | 4.73 ± 0.205  | 4.99 ± 0.459  | 0.802           |
| Sow BF, mm                              |               |               |                 |
| On 85th day of pregnancy                | 15.13 ± 0.639 | 15.47 ± 0.509 | 0.351           |
| On 1st day of lactation                 | 16.50 ± 0.534 | 16.74 ± 0.648 | 0.274           |
| On 14th day of lactation                | 14.50 ± 0.597 | 14.74 ± 0.732 | 0.242           |
| BF loss, mm                             |               |               |                 |
| 1st–14 <sup>th</sup> day of lactation   | –1.85 ± 0.242 | –2.00 ± 0.562 | 0.205           |

A group: Sows (n = 9) that we selected to collect samples in L-E group, B group: All sows (n = 25) in L-E group. The variance of each group is equal when  $p > 0.05$ ; the variance of each group is not equal when  $p < 0.05$ .

**Table S4. The reproductive performance of sows in C group**

|                          | group         |               | <i>p</i> -value |
|--------------------------|---------------|---------------|-----------------|
|                          | A group       | B group       |                 |
| Litter size, n           | 12.20 ± 0.734 | 12.14 ± 0.517 | 0.496           |
| Number born alive, n     | 11.00 ± 0.548 | 10.38 ± 0.374 | 0.401           |
| Number of stillbirths, n | 2.20 ± 0.374  | 1.71 ± 0.293  | 0.405           |
| IUGR, n <sup>1</sup>     | 0.30 ± 0.213  | 0.23 ± 0.136  | 0.760           |
| Birth weight, kg         | 1.31 ± 0.070  | 1.36 ± 0.045  | 0.955           |
| FARPLA, h                | 3.80 ± 0.300  | 3.86 ± 0.523  | 0.198           |

A group: Sows (n = 9) that we selected to collect samples in C group, B group: All sows (n = 25) in C group. The variance of each group is equal when  $p > 0.05$ ; the variance of each group is not equal when  $p < 0.05$ .

**Table S5. The reproductive performance of sows in E-L group**

|                          | group         |               | <i>p</i> -value |
|--------------------------|---------------|---------------|-----------------|
|                          | A group       | B group       |                 |
| Litter size, n           | 11.50 ± 0.846 | 11.85 ± 0.460 | 0.850           |
| Number born alive, n     | 10.33 ± 0.954 | 10.45 ± 0.444 | 0.664           |
| Number of stillbirths, n | 1.21 ± 0.525  | 1.10 ± 0.260  | 0.933           |
| IUGR, n                  | 0.10 ± 0.09   | 0.05 ± 0.040  | 0.325           |
| Birth weight, kg         | 1.50 ± 0.070  | 1.48 ± 0.052  | 0.207           |
| FARPLA, h                | 2.93 ± 0.416  | 2.96 ± 0.277  | 0.833           |

A group: Sows (n = 9) that we selected to collect samples in E-L group, B group: All sows (n = 25) in E-L group. The variance of each group is equal when  $p > 0.05$ ; the variance of each group is not equal when  $p < 0.05$ .

**Table S6. The reproductive performance of sows in L-E group**

|                          | group         |                            | <i>P</i> -value |
|--------------------------|---------------|----------------------------|-----------------|
|                          | A group       | B group                    |                 |
| Litter size, n           | 12.00 ± 0.683 | 12.50 ± 0.489              | 0.211           |
| Number born alive, n     | 10.83 ± 0.542 | 11.40 ± 0.358 <sup>b</sup> | 0.677           |
| Number of stillbirths, n | 0.38 ± 0.201  | 0.95 ± 0.198               | 0.306           |
| IUGR, n                  | 0.20 ± 0.100  | 0.15 ± 0.130               | 0.738           |
| Birth weight, kg         | 1.56 ± 0.043  | 1.40 ± 0.033               | 0.327           |
| FARPLA, h                | 2.61 ± 0.280  | 2.34 ± 0.216               | 0.366           |

A group: Sows (n = 9) that we selected to collect samples in L-E group, B group: All sows (n = 25) in L-E group. The variance of each group is equal when  $p > 0.05$ ; the variance of each group is not equal when  $p < 0.05$ .
